# Supplementary material for: Interaction between Occupational and Non-Occupational Arsenic Exposure and Tobacco Smoke on Lung Cancerogenesis: A Systematic Review
Source: MDPI journal article supplement (doi:10.3390/ijerph20054167), 2023-02-25
Supplement: s1 [file s1]

## Supplementary Materials

**Table S1: NOS values for the included studies.**

Each author's study can be awarded a minimum of one star (\*) and a maximum of four stars (\*\*\*\*) for each numbered item, as reported in the Newcastle–Ottawa Assessment Scale (NOS) [27].

### Su Z. [30]

| COHORT STUDIES                                                              | Star | Total stars/group | Value |
|-----------------------------------------------------------------------------|------|-------------------|-------|
| <b>SELECTION</b>                                                            |      | ****              | 4     |
| 1) Representativeness of the Exposed Cohort                                 | *    |                   |       |
| 2) Selection of the Non-Exposed Cohort                                      | *    |                   |       |
| 3) Ascertainment of Exposure                                                | *    |                   |       |
| 4) Demonstration That Outcome of Interest Was Not Present at Start of Study | *    |                   |       |
| <b>COMPARABILITY</b>                                                        |      | **                | 2     |
| 1) Comparability of Cohorts on the Basis of the Design or Analysis          | **   |                   |       |
| <b>OUTCOME</b>                                                              |      | ***               | 3     |
| 1) Assessment of Outcome                                                    | *    |                   |       |
| 2) Was Follow-Up Long Enough for Outcomes to Occur                          | *    |                   |       |
| 3) Adequacy of Follow Up of Cohorts                                         | *    |                   |       |
| <b>TOTAL STARS/ VALUES</b>                                                  |      | nine              | 9     |

### Fan Y. [44]

| COHORT STUDIES                                                              | Star | Total stars/group | Value |
|-----------------------------------------------------------------------------|------|-------------------|-------|
| <b>SELECTION</b>                                                            |      | **                | 2     |
| 1) Representativeness of the Exposed Cohort                                 | *    |                   |       |
| 2) Selection of the Non-Exposed Cohort                                      |      |                   |       |
| 3) Ascertainment of Exposure                                                | *    |                   |       |
| 4) Demonstration That Outcome of Interest Was Not Present at Start of Study |      |                   |       |
| <b>COMPARABILITY</b>                                                        |      | *                 | 1     |

|                                                                    |   |      |   |
|--------------------------------------------------------------------|---|------|---|
| 1) Comparability of Cohorts on the Basis of the Design or Analysis | * |      |   |
| <b>OUTCOME</b>                                                     |   | **   | 2 |
| 1) Assessment of Outcome                                           | * |      |   |
| 2) Was Follow-Up Long Enough for Outcomes to Occur                 | * |      |   |
| 3) Adequacy of Follow Up of Cohorts                                |   |      |   |
| <b>TOTAL STARS/ VALUES</b>                                         |   | five | 5 |

### Steinmaus C.M. [29]

| <b>CASE CONTROL</b>                                                           | <b>Star</b> | <b>Total stars/group</b> | <b>Value</b> |
|-------------------------------------------------------------------------------|-------------|--------------------------|--------------|
| <b>SELECTION</b>                                                              |             | ***                      | 3            |
| 1) Is the Case Definition Adequate?                                           | *           |                          |              |
| 2) Representativeness of the Cases                                            | *           |                          |              |
| 3) Selection of Controls                                                      | *           |                          |              |
| 4) Definition of Controls                                                     |             |                          |              |
| <b>COMPARABILITY</b>                                                          |             | *                        | 1            |
| 1) Comparability of Cases and Controls on the Basis of the Design or Analysis | *           |                          |              |
| <b>EXPOSURE</b>                                                               |             |                          | 2            |
| 1) Ascertainment of Exposure                                                  | *           |                          |              |
| 2) Same method of ascertainment for cases and controls                        | *           |                          |              |
| 3) Non-Response Rate                                                          |             |                          |              |
| <b>TOTAL STARS/ VALUES</b>                                                    |             | six                      | 6            |

### D'Ippoliti D. [42]

| <b>COHORT STUDIES</b>                                                       | <b>Star</b> | <b>Total stars/group</b> | <b>Value</b> |
|-----------------------------------------------------------------------------|-------------|--------------------------|--------------|
| <b>SELECTION</b>                                                            |             | *                        | 1            |
| 1) Representativeness of the Exposed Cohort                                 | *           |                          |              |
| 2) Selection of the Non-Exposed Cohort                                      |             |                          |              |
| 3) Ascertainment of Exposure                                                |             |                          |              |
| 4) Demonstration That Outcome of Interest Was Not Present at Start of Study |             |                          |              |

|                                                                    |   |      |   |
|--------------------------------------------------------------------|---|------|---|
| <b>COMPARABILITY</b>                                               |   |      |   |
| 1) Comparability of Cohorts on the Basis of the Design or Analysis |   |      |   |
| <b>OUTCOME</b>                                                     |   | ***  | 3 |
| 1) Assessment of Outcome                                           | * |      |   |
| 2) Was Follow-Up Long Enough for Outcomes to Occur                 | * |      |   |
| 3) Adequacy of Follow Up of Cohorts                                | * |      |   |
| <b>TOTAL STARS/ VALUES</b>                                         |   | four | 4 |

### Steinmaus C.M. [35]

| <b>CASE CONTROL</b>                                                           | <b>Star</b> | <b>Total stars/group</b> | <b>Value</b> |
|-------------------------------------------------------------------------------|-------------|--------------------------|--------------|
| <b>SELECTION</b>                                                              |             | ****                     | 4            |
| 1) Is the Case Definition Adequate?                                           | *           |                          |              |
| 2) Representativeness of the Cases                                            | *           |                          |              |
| 3) Selection of Controls                                                      | *           |                          |              |
| 4) Definition of Controls                                                     | *           |                          |              |
| <b>COMPARABILITY</b>                                                          |             | **                       | 2            |
| 1) Comparability of Cases and Controls on the Basis of the Design or Analysis | **          |                          |              |
| <b>EXPOSURE</b>                                                               |             | **                       | 2            |
| 1) Ascertainment of Exposure                                                  | *           |                          |              |
| 2) Same method of ascertainment for cases and controls                        | *           |                          |              |
| 3) Non-Response Rate                                                          |             |                          |              |
| <b>TOTAL STARS/ VALUES</b>                                                    |             | eight                    | 8            |

### Steinmaus C.M. [36]

| <b>CASE CONTROL</b>                 | <b>Star</b> | <b>Total stars/group</b> | <b>Value</b> |
|-------------------------------------|-------------|--------------------------|--------------|
| <b>SELECTION</b>                    |             | ****                     | 4            |
| 1) Is the Case Definition Adequate? | *           |                          |              |
| 2) Representativeness of the Cases  | *           |                          |              |
| 3) Selection of Controls            | *           |                          |              |
| 4) Definition of Controls           | *           |                          |              |
| <b>COMPARABILITY</b>                |             | **                       | 2            |

|                                                                                                                |        |       |   |
|----------------------------------------------------------------------------------------------------------------|--------|-------|---|
| 1) Comparability of Cases and Controls on the Basis of the Design or Analysis                                  | **     |       |   |
| <b>EXPOSURE</b>                                                                                                |        | **    | 2 |
| 1) Ascertainment of Exposure<br>2) Same method of ascertainment for cases and controls<br>3) Non-Response Rate | *<br>* |       |   |
| <b>TOTAL STARS/ VALUES</b>                                                                                     |        | eight | 8 |

### Hsu L. [31]

| <b>COHORT STUDIES</b>                                                                                                                                                                                | <b>Star</b> | <b>Total stars/group</b> | <b>Value</b> |
|------------------------------------------------------------------------------------------------------------------------------------------------------------------------------------------------------|-------------|--------------------------|--------------|
| <b>SELECTION</b>                                                                                                                                                                                     |             | ***                      | 3            |
| 1) Representativeness of the Exposed Cohort<br>2) Selection of the Non-Exposed Cohort<br>3) Ascertainment of Exposure<br>4) Demonstration That Outcome of Interest Was Not Present at Start of Study | *<br>*<br>* |                          |              |
| <b>COMPARABILITY</b>                                                                                                                                                                                 |             | *                        | 1            |
| 1) Comparability of Cohorts on the Basis of the Design or Analysis                                                                                                                                   | *           |                          |              |
| <b>OUTCOME</b>                                                                                                                                                                                       |             | *                        | 1            |
| 1) Assessment of Outcome<br>2) Was Follow-Up Long Enough for Outcomes to Occur<br>3) Adequacy of Follow Up of Cohorts                                                                                | *           |                          |              |
| <b>TOTAL STARS/ VALUES</b>                                                                                                                                                                           |             | five                     | 5            |

### Ferreccio C. [37]

| <b>CASE CONTROL</b>                                                                                                                | <b>Star</b> | <b>Total stars/group</b> | <b>Value</b> |
|------------------------------------------------------------------------------------------------------------------------------------|-------------|--------------------------|--------------|
| <b>SELECTION</b>                                                                                                                   |             | ***                      | 3            |
| 1) Is the Case Definition Adequate?<br>2) Representativeness of the Cases<br>3) Selection of Controls<br>4) Definition of Controls | *<br>*<br>* |                          |              |

|                                                                               |   |     |   |
|-------------------------------------------------------------------------------|---|-----|---|
| <b>COMPARABILITY</b>                                                          |   | *   | 1 |
| 1) Comparability of Cases and Controls on the Basis of the Design or Analysis | * |     |   |
| <b>EXPOSURE</b>                                                               |   | **  | 2 |
| 1) Ascertainment of Exposure                                                  | * |     |   |
| 2) Same method of ascertainment for cases and controls                        | * |     |   |
| 3) Non-Response Rate                                                          |   |     |   |
| <b>TOTAL STARS/ VALUES</b>                                                    |   | six | 6 |

### Dauphiné D.C. [38]

| <b>CASE CONTROL</b>                                                           | <b>Star</b> | <b>Total stars/group</b> | <b>Value</b> |
|-------------------------------------------------------------------------------|-------------|--------------------------|--------------|
| <b>SELECTION</b>                                                              |             | ****                     | 4            |
| 1) Is the Case Definition Adequate?                                           | *           |                          |              |
| 2) Representativeness of the Cases                                            | *           |                          |              |
| 3) Selection of Controls                                                      | *           |                          |              |
| 4) Definition of Controls                                                     | *           |                          |              |
| <b>COMPARABILITY</b>                                                          |             | **                       | 2            |
| 1) Comparability of Cases and Controls on the Basis of the Design or Analysis | **          |                          |              |
| <b>EXPOSURE</b>                                                               |             | **                       | 2            |
| 1) Ascertainment of Exposure                                                  | *           |                          |              |
| 2) Same method of ascertainment for cases and controls                        | *           |                          |              |
| 3) Non-Response Rate                                                          |             |                          |              |
| <b>TOTAL STARS/ VALUES</b>                                                    |             | eight                    | 8            |

### Chen C. [32]

| <b>COHORT STUDIES</b>                                                       | <b>Star</b> | <b>Total stars/group</b> | <b>Value</b> |
|-----------------------------------------------------------------------------|-------------|--------------------------|--------------|
| <b>SELECTION</b>                                                            |             | ****                     | 4            |
| 1) Representativeness of the Exposed Cohort                                 | *           |                          |              |
| 2) Selection of the Non-Exposed Cohort                                      | *           |                          |              |
| 3) Ascertainment of Exposure                                                | *           |                          |              |
| 4) Demonstration That Outcome of Interest Was Not Present at Start of Study | *           |                          |              |

|                                                                    |   |       |   |
|--------------------------------------------------------------------|---|-------|---|
| <b>COMPARABILITY</b>                                               |   | *     | 1 |
| 1) Comparability of Cohorts on the Basis of the Design or Analysis | * |       |   |
| <b>OUTCOME</b>                                                     |   | **    | 2 |
| 1) Assessment of Outcome                                           | * |       |   |
| 2) Was Follow-Up Long Enough for Outcomes to Occur                 | * |       |   |
| 3) Adequacy of Follow Up of Cohorts                                |   |       |   |
| <b>TOTAL STARS/ VALUES</b>                                         |   | seven | 7 |

### Paul S. [41]

| COHORT STUDIES                                                              | Star | Total stars/group | Value |
|-----------------------------------------------------------------------------|------|-------------------|-------|
| <b>SELECTION</b>                                                            |      | ***               | 3     |
| 1) Representativeness of the Exposed Cohort                                 |      |                   |       |
| 2) Selection of the Non-Exposed Cohort                                      | *    |                   |       |
| 3) Ascertainment of Exposure                                                | *    |                   |       |
| 4) Demonstration That Outcome of Interest Was Not Present at Start of Study | *    |                   |       |
| <b>COMPARABILITY</b>                                                        |      |                   |       |
| 1) Comparability of Cohorts on the Basis of the Design or Analysis          |      |                   |       |
| <b>OUTCOME</b>                                                              |      | *                 | 1     |
| 1) Assessment of Outcome                                                    | *    |                   |       |
| 2) Was Follow-Up Long Enough for Outcomes to Occur                          |      |                   |       |
| 3) Adequacy of Follow Up of Cohorts                                         |      |                   |       |
| <b>TOTAL STARS/ VALUES</b>                                                  |      | four              | 4     |

### Marano K.M [43]

| COHORT STUDIES                              | Star | Total stars/group | Value |
|---------------------------------------------|------|-------------------|-------|
| <b>SELECTION</b>                            |      | *                 | 1     |
| 1) Representativeness of the Exposed Cohort | *    |                   |       |

|                                                                                                                                                       |   |     |   |
|-------------------------------------------------------------------------------------------------------------------------------------------------------|---|-----|---|
| 2) Selection of the Non-Exposed Cohort<br>3) Ascertainment of Exposure<br>4) Demonstration That Outcome of Interest Was Not Present at Start of Study |   |     |   |
| <b>COMPARABILITY</b>                                                                                                                                  |   |     |   |
| 1) Comparability of Cohorts on the Basis of the Design or Analysis                                                                                    |   |     |   |
| <b>OUTCOME</b>                                                                                                                                        |   | *   | 1 |
| 1) Assessment of Outcome<br>2) Was Follow-Up Long Enough for Outcomes to Occur<br>3) Adequacy of Follow Up of Cohorts                                 | * |     |   |
| <b>TOTAL STARS/ VALUES</b>                                                                                                                            |   | two | 2 |

#### Wadhwa S.K. [39]

| <b>CASE CONTROL</b>                                                                                                                | <b>Star</b> | <b>Total stars/group</b> | <b>Value</b> |
|------------------------------------------------------------------------------------------------------------------------------------|-------------|--------------------------|--------------|
| <b>SELECTION</b>                                                                                                                   |             | **                       | 2            |
| 1) Is the Case Definition Adequate?<br>2) Representativeness of the Cases<br>3) Selection of Controls<br>4) Definition of Controls | *<br>*      |                          |              |
| <b>COMPARABILITY</b>                                                                                                               |             |                          |              |
| 1) Comparability of Cases and Controls on the Basis of the Design or Analysis                                                      |             |                          |              |
| <b>EXPOSURE</b>                                                                                                                    |             | **                       | 2            |
| 1) Ascertainment of Exposure<br>2) Same method of ascertainment for cases and controls<br>3) Non-Response Rate                     | *<br>*      |                          |              |
| <b>TOTAL STARS/ VALUES</b>                                                                                                         |             | four                     | 4            |

#### Olsson A.C. [33]

| <b>CASE CONTROL</b>                 | <b>Star</b> | <b>Total stars/group</b> | <b>Value</b> |
|-------------------------------------|-------------|--------------------------|--------------|
| <b>SELECTION</b>                    |             | ***                      | 3            |
| 1) Is the Case Definition Adequate? | *           |                          |              |

|                                                                               |    |       |   |
|-------------------------------------------------------------------------------|----|-------|---|
| 2) Representativeness of the Cases                                            | *  |       |   |
| 3) Selection of Controls                                                      | *  |       |   |
| 4) Definition of Controls                                                     |    |       |   |
| <b>COMPARABILITY</b>                                                          |    | **    | 2 |
| 1) Comparability of Cases and Controls on the Basis of the Design or Analysis | ** |       |   |
| <b>EXPOSURE</b>                                                               |    | **    | 2 |
| 1) Ascertainment of Exposure                                                  | *  |       |   |
| 2) Same method of ascertainment for cases and controls                        | *  |       |   |
| 3) Non-Response Rate                                                          |    |       |   |
| <b>TOTAL STARS/ VALUES</b>                                                    |    | seven | 7 |

**'t Mannetje A. [34]**

| <b>CASE CONTROL</b>                                                           | <b>Star</b> | <b>Total stars/group</b> | <b>Value</b> |
|-------------------------------------------------------------------------------|-------------|--------------------------|--------------|
| <b>SELECTION</b>                                                              |             | ***                      | 3            |
| 1) Is the Case Definition Adequate?                                           |             |                          |              |
| 2) Representativeness of the Cases                                            | *           |                          |              |
| 3) Selection of Controls                                                      | *           |                          |              |
| 4) Definition of Controls                                                     | *           |                          |              |
| <b>COMPARABILITY</b>                                                          |             | **                       | 2            |
| 1) Comparability of Cases and Controls on the Basis of the Design or Analysis | **          |                          |              |
| <b>EXPOSURE</b>                                                               |             | **                       | 2            |
| 1) Ascertainment of Exposure                                                  | *           |                          |              |
| 2) Same method of ascertainment for cases and controls                        | *           |                          |              |
| 3) Non-Response Rate                                                          |             |                          |              |
| <b>TOTAL STARS/ VALUES</b>                                                    |             | seven                    | 7            |

**Melak D. [40]**

| <b>CASE CONTROL</b>                 | <b>Star</b> | <b>Total stars/group</b> | <b>Value</b> |
|-------------------------------------|-------------|--------------------------|--------------|
| <b>SELECTION</b>                    |             | ****                     | 4            |
| 1) Is the Case Definition Adequate? | *           |                          |              |
| 2) Representativeness of the Cases  | *           |                          |              |
| 3) Selection of Controls            | *           |                          |              |



|                                                                               |    |              |          |
|-------------------------------------------------------------------------------|----|--------------|----------|
| 4) Definition of Controls                                                     |    |              |          |
| <b>COMPARABILITY</b>                                                          |    | **           | 2        |
| 1) Comparability of Cases and Controls on the Basis of the Design or Analysis | ** |              |          |
| <b>EXPOSURE</b>                                                               |    | **           | 2        |
| 1) Ascertainment of Exposure                                                  | *  |              |          |
| 2) Same method of ascertainment for cases and controls                        | *  |              |          |
| 3) Non-Response Rate                                                          |    |              |          |
| <b>TOTAL STARS/ VALUES</b>                                                    |    | <b>eight</b> | <b>8</b> |
